# Supplementary material for: Cationic gold(i) heteroleptic complexes bearing a pyrazole-derived N-heterocyclic carbene: syntheses, characterizations, and cytotoxic activities
Source: Royal Society of Chemistry journal article supplement (doi:10.1039/c3dt51071a), 2013-01-01

# Supplementary Information

*for*

Cationic gold(I) heteroleptic complexes bearing a pyrazole-  
derived N-heterocyclic carbene: syntheses, characterizations,  
and cytotoxic activities

Haresh Sivaram,<sup>a</sup> Jackie Tan<sup>b</sup> and Han Vinh Huynh<sup>\*a</sup>

<sup>a</sup> Department of Chemistry, National University of Singapore, 3 Science Drive 3, Singapore  
117543, Republic of Singapore

<sup>b</sup> Department of Biological Sciences, National University of Singapore, 14 Science Drive 4,  
Singapore 117543, Republic of Singapore

\*E-mail: [chmhhv@nus.edu.sg](mailto:chmhhv@nus.edu.sg)

### Dose-response curves for complexes 3–12

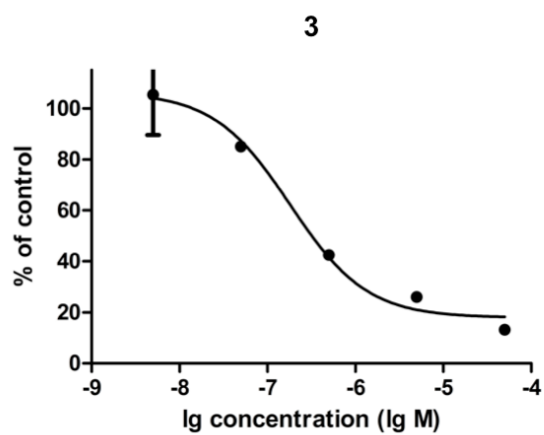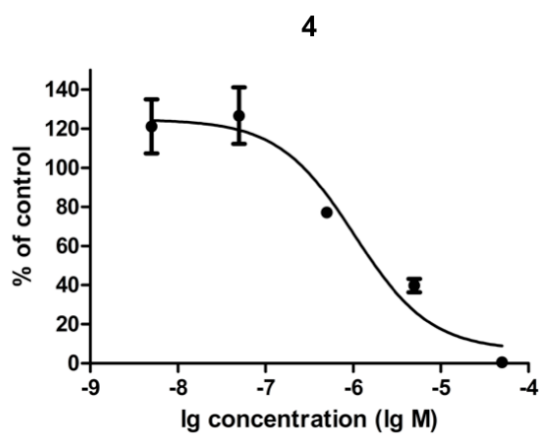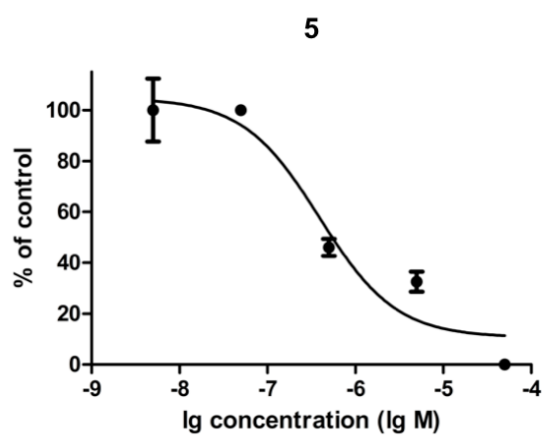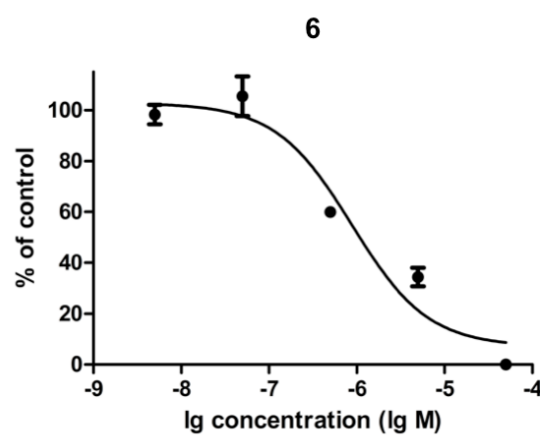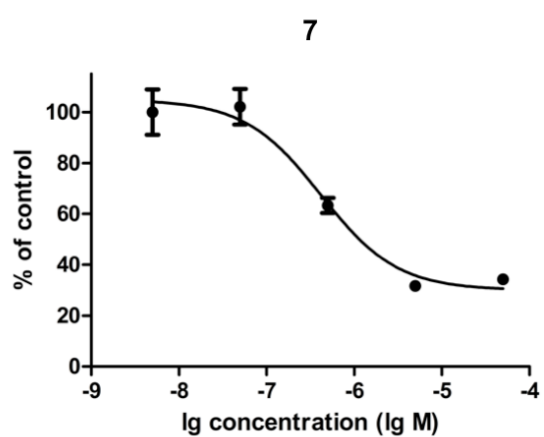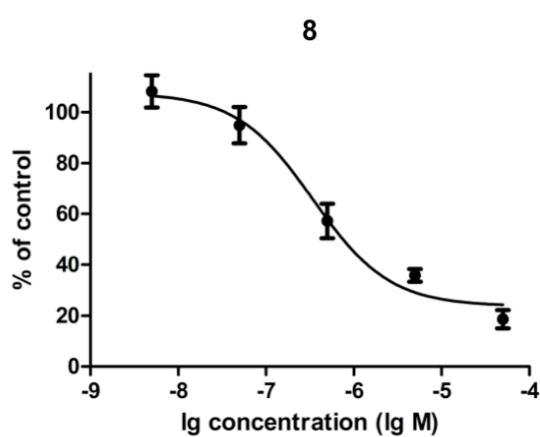

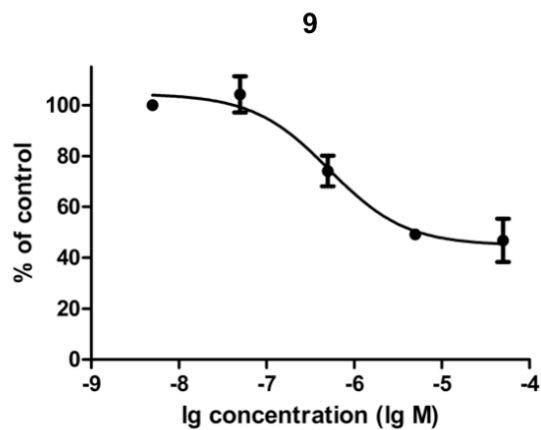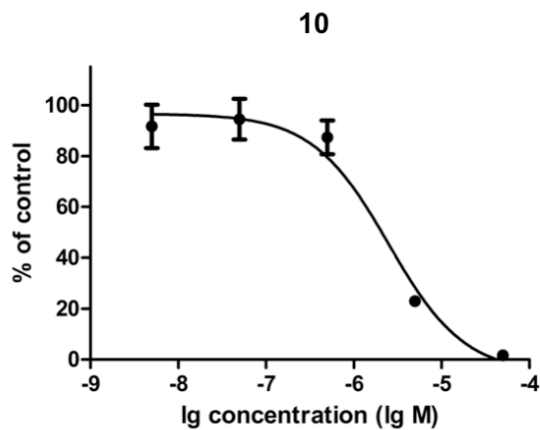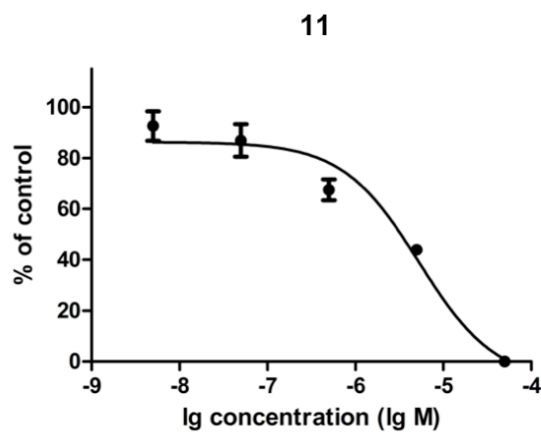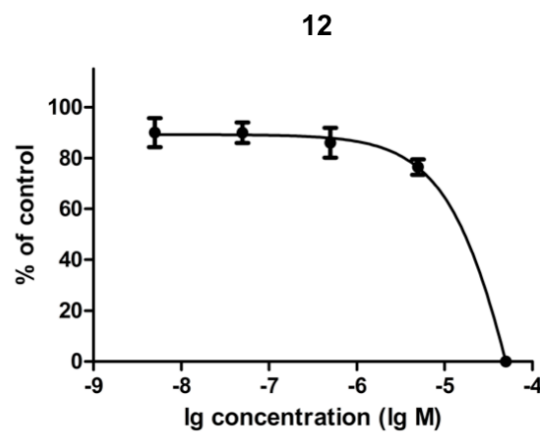

Supplement: c3dt51071a.pdf [file c3dt51071a.pdf]
